# Supplementary material
Source: publisher figshare collection journal article supplement (https://gsajournals.figshare.com/ndownloader/files/24712208)
Supplement: Supplementary file 1 [file 24712208]

#heliumInput = PEDIGREE
LineName	Parent
La_Constante	Unknown_chiloensis_025
Kentish_Favorite	Captain
Latest_Of_All	British_Queen
Rosie_1999	Cardinal
Rosie_1991	ISF_80-52-1
Sir_Harry	Keens_Seedling
Sir_J._Paxton	NA
Gariguette	Belrubi
Lucida_Perfecta	Lucida
Marguerite_Lebreton	Sir_Harry
Muscade	Spate_von_Leopoldshall
Nicaise	NA
Ville_de_Paris	Capron
Ada_Herzberg	Uberreich
Garteninspektor_Koch	NA
Helena_Gloede	NA
Johannes_Muller	Wunder_von_Kothen
Senga_Pantagruella	SO_319
Senga_Tigaiga	Senga_1021
Sieger	Noble
Spate_von_Leopoldshall	Comet_1880
Onda	83.52.1
Addie	Senga_Pantagruella
Idea	79-12-13
Siris	NA
Viking	Honeoye
Troubadour	61AM68
Talisman	NJ_1051
Tudnew	Planasa_85-20
Belle_Rouge	Morioka_19
Benihoppe	Akihime
Kitanokagayaki	Belle_Rouge
Nouhime	Aiberry
Terunoka	Donner
Tochiotome	Kurume49
Kunowase	Unknown_ananassa_303
Sachinoka	Toyonoka
Sagahonoka	Osuzu
Shikinari	NA
Guardsman	Claribel
Veestar	Valentine_1941
Selkirk	Earlibelle
Evangeline	K88-4
Sable	Veestar
Saint_Pierre	Chandler
Uzushio	Hogyoku
Vanguard	Pocomoke
Williams	Crescent
Burr's_Seedling	NA
Uncle_Cap	Mastodon
Gandy	Jersey_Queen
Hooker's_Seedling	NA
Leader	NA
Lennig	Wilson
Miner	NA
Pan_American	Bismarck
Parry	Jersey_Queen
Sparkle	Fairfax
Honeoye	Vibrant
Howard_17	Crescent
Vesper	Utah_Shipper
Holiday	NY_844
Ross_Phoenix	Keens_Seedling
Bellmar	Missionary
Hoffman	Neunan
Lovett	Crescent
Marion_Bell	Fairmore
Neunan	Wilson
Parsons	NA
Guardian	NC_1768
Tennessee_Beauty	Missionary
Sunrise	US_4152
Temple	Aberdeen
Stelemaster	Fairland
Sweet_Charlie	FL_80-456
Strawberry_Festival	Rosa_Linda
Willard	NA
Baeza	M1
Euresko	Chesapeake
Lindalicious	Fairfax
Ft._Laramie	Geneva
Shuksan	WSU_685
Linn	MDUS_3184
Olympus	Mollala
Siletz	ORUS_2012
Trebla	Ettersburg_114
Sitka	Unknown_chiloensis_002
Sonora	33x257
Splendor	Camarosa
Von_Humboldt	Unknown_ananassa_052
Mojave	Palomar
Solana	Cal_103.22
Sequoia	51S001P001
Salinas	37C002P011
Laguna	Irvine
Gaviota	87C112P006
Ventana	93C170P606
Sierra	Cal_177.21
232	NA
1007	NA
1242	NA
1285	NA
1501	NA
2004258	NA
00C046P601	96C172P001
00C057P613	96C034P602
01C057P601	98C039P802
01C061P602	97C085P006
01C111P004	Albion
01C118P002	96C189P004
01C134P001	97C085P006
01C134P003	97C085P006
01C158P001	97C084P001
01C187P006	97C096P008
02C016P601	97C033P603
02C068P605	99C014P604
02C068P608	99C014P604
02C093P006	98C153P003
02C095P004	98C153P003
02C103P002	98C153P003
02C104P003	99C119P001
02C132P006	97C079P014
02C156P002	98C127P003
02C164P002	98C133P003
02C229P001	97C079P014
02EVA13R	NA
03C001P606	98C007P606
03C016P601	00C046P601
03C048P601	99C079P601
03C065P601	00C027P603
03C092P008	99C051P604
03C102P002	99C119P001
03C103P005	99C111P013
03C111P005	99C088P007
03C117P002	NA
03C129P002	98C104P014
03C132P003	98C153P003
03C149P008	99C109P003
03C163P001	99C111P005
03C163P009	99C111P005
03C172P004	99C112P003
03C195P008	99C088P006
04AA21	NA
04C020P604	01C024P602
04C038P603	99C014P604
04C041P007	Palomar
04C042P607	01C014P603
04C045P605	01C061P602
04C073P002	00C139P003
04C076P004	01C057P601
05C054P611	Palomar
05C065P608	01C076P602
05C092P011	Monterey
05C092P014	Monterey
05C097P007	Palomar
05C097P009	Palomar
05C148P002	02C229P001
05C172P002	02C143P003
05C197P002	01C134P003
05C199P010	01C187P006
05C205P002	02C104P003
06C051P609	02C068P608
06C090P605	00C139P003
06C106P002	02C103P002
06C109P003	03C163P001
06C110P004	03C163P001
06C111P001	02C103P002
06C132P001	03C092P008
06C132P002	03C092P008
06C137P002	02C132P006
06C202P001	03C129P002
07C001P608	03C111P005
07C009P601	04C038P603
07C135P001	02C103P002
08C014P001	05C117P005
08C043P004	04C041P006
36C024P029	Cal_68.25
38A237	NA
572I16	NA
59B107P007	Unknown_vesca_028
59C051P011	54C124P002
61S018P045	42C008P016
61S018P087	42C008P016
63C007P101	Cal_794.19
64C003P020	Solana
72C088P060	NA
72C309P601	Tufts
72C349P605	65C303P015
77C003P603	Pajaro
77G1	NA
78.65.1	Unknown_ananassa_201
83.5.8	78.65.1
83C018P001	Douglas
84-8-443	NA
86.285.1	Honeoye
86.288.1	NA
86C832P001	72C531P004
87C107P004	Seascape
87C289P201	NA
87C289P202	NA
88-042-35	NA
88C012P002	Chandler
88C270P001	85C197P001
89C007P606	NA
89C028P604	NA
90C253P003	86C012P002
91C238P002	87C289P201
91C244P003	87C289P201
91C326P001	88C118P603
92C035P601	89C006P602
92C040P606	NA
92C245P002	85C093P003
93C046P003	87C120P001
93C071P006	89C259P032
93C072P009	89C230P007
93C084P005	89C230P007
93C173P602	NA
94C086P006	90C218P005
94C251P604	89C029P623
94C255P604	89C029P623
94C256P607	90C253P003
94C257P604	89C028P604
94C262P603	89C029P623
94C265P607	91C321P601
94C300P601	89C028P604
94C306P002	91C244P003
95.617.1	NA
95C051P604	91C086P601
95C077P002	89C218P031
95C079P005	91C269P001
95C085P003	91C269P001
95C096P001	89C218P031
95C179P002	91C248P005
96C033P610	92C048P601
96C189P004	91C256P005
96C207P003	92C289P004
97C005P611	92C245P002
97C012P604	92C245P002
97C013P605	92C291P003
97C033P603	92C291P003
97C079P014	92C245P002
97C110P005	93C012P006
97C156P002	91C268P003
98C032P605	93C198P603
98C062P601	94C019P005
98C153P003	95C179P002
98C153P009	95C179P002
98C153P013	95C179P002
98C174P006	94C086P006
99C109P003	95C085P003
99C111P013	95C179P002
99C112P003	96C207P003
Ambato_NAH	NA
AU_2001-084	Earlimist
AU_2004-290	NA
B-15	Royal_Sovereign
B793	MDUS_5393
Belle_de_Meaux	NA
Brock85	Floridabelle
C_4	NA
Cal_143.7	Narcissa
Cal_145.23	BH_14
Cal_189.5	Cal_7.20
Cal_222.5	Cal_66.2
Cal_238.7	Cal_67.5
Cal_250.1	Cal_86.1
Cal_250.4	Cal_86.1
Cal_337.5	Nich_Ohmer
Cal_612.17	Cal_168.3
Cal_623.3	Cal_144.2
Cal_642.5	Cal_341.2
Cal_648.2	Cal_378.16
Cal_66.2	Marshall
Cal_66.6	US_634
Cal_67.14	US_634
Cal_67.17	US_634
Cal_67.5	US_634
Cal_677.10	Cal_469.6
Cal_68.1	US_634
Cal_68.20	US_634
Cal_68.24	NY_4626
Cal_68.25	NY_4626
Cal_687.30	Cal_488.7
Cal_7.28	Blakemore
Cal_7.9a	Blakemore
Cal_747.5	Cal_370.14
Cal_752.1	Cal_370.14
Cal_752.10	Cal_370.14
Cal_752.23	Cal_370.14
Cal_752.31	Cal_370.14
Cal_752.46	Cal_370.14
Cal_756.11	Cal_370.14
Cal_800.13	Cal_468.4
Cal_828.15	Cal_611.4
Cal_86.1	Z_11
Cal_869.4	Shasta
Ettersburg_20	Unknown_chiloensis_014
Ettersburg_88	William_Belt
Everbearing	NA
F602/2	NA
Fertodi_602/16	NA
Festivalnaja	Obilnaja
FL_00-59	NA
FL_02-66	NA
FL_10-24	FL_07-168
FL_87-210	FL_82-1452
FL_93-103	Rosa_Linda
FL_93-161	Rosa_Linda
FL_93-53	FL_90-57
FL_95-316	FL_93-53
FL_95-332	NA
FVC_16-1	RC_8
Helgoland	NA
Institute_X2	Cal_638.45
Iowa_3-7165	Stoplight
Joe	Glendale_Late
K06-12	Willy_5
K06-16	NA
K06-2	Willy_2
K06-3	Willy_5
K06-9	NA
K08-10	K06-3
K10-12	K06-9
K12-10	K10-12
K60-98	Louise
K68-58	Redgauntlet
K71-8	Salinas
K73-18	Micmac
K79-4	Holiday
K79-5	Earliglow
K86-19	ArKing
K88-4	Honeoye
K91-15	Bogota
Kei203	Kurume48
Kurume49	Toyonoka
Kurume53	NA
Kurume54	NA
KY_15	NA
L_181	NA
LA_59-138	NA
LA_883	NA
LA3-1169	LA-0-242
LA941	NA
Lindamore	Aiberry
Lucida	NA
MDUS_2596	Stelemaster
MDUS_2611	US_4152
MDUS_2650_pollen_parent	Fairpeake
MDUS_2905	Redstar
MDUS_2966	MDUS_2386
MDUS_3022	MDUS_2321
MDUS_3082	NC_1768
MDUS_5252	NA
MNUS_15	NA
MNUS_99	WI_8002
Mrs_H_Cheron	NA
MSU_56	Cabot
MSUS_42	NA
NC_1053	Massey
NC_2665	Dixieland
NC_3892	Sunrise
NC_3920	NA
NC_4093	NA
NCH_87-10	Hecker
New_Mammoth	NA
NW_90055-35	WA_87010-7
NY_1123	Senga_Sengana
NY_113	Honeoye
NY_1221	NY_E-58
NY_1261	Redcoat
NY_1424	NA
Oishishikinari_1	NA
Old_Scarlet	NA
ORUS_1088	Blakemore
ORUS_2016-1	Valley_Red
ORUS_2242	ORUS_2012
ORUS_2461	Aromas
ORUS_2769	ORUS_2371
ORUS_2893	ORUS_2234
ORUS_2975	ORUS_2732
ORUS_3137	NA
ORUS_3746	ORUS_2975
ORUS_3845	ORUS_2975
ORUS_437	NA
ORUS_59	Marshall
ORUS_60	Ettersburg_121
ORUS_750-1	Totem
ORUS_815	Unknown_ananassa_425
ORUS_923-316	Tyee
Kurume103	Unknown_ananassa_306
Sivetta	Redgauntlet
Juspa	Jucunda
CA_1364	Unknown_chiloensis_054
CA_1367	NA
Sitka_hybrid	Sitka
Mimek	6042
MDUS_4587	MDUS_3694
2_BRA_1A	NA
NAH_4	NA
HM1	NA
LH_50-4	NA
Venta	Senga_Sengana
Rubygem	Earlibrite
RV_1	Montreal_River_10
Salvi_5	NA
Salvi_8	NA
Samling	NA
Santiago_de_Chile	NA
SE-1823-4	NA
Seedling_11	Aberdeen
Selen	NA
Senga_1260	Sparkle
SJ8518-9	Surecrop
SJ8916-1	Joliette
SJ9616-1	Joliette
SO_319	NA
Sofija	NA
Sonata	Elsanta
Strideway	NA
Superb_57	NA
Surpriz_Olympiade	Festivalnaja
T.V._Munson_No.3	Miner
Unknown_ananassa_001	Unknown_ananassa_002
Unknown_ananassa_006	Garteninspektor_Koch
Unknown_ananassa_007	Regina
Unknown_ananassa_021	Autumn
Unknown_ananassa_029	Rockhill
Unknown_ananassa_030	Unknown_virginiana_004
Unknown_ananassa_031	Fairfax
Unknown_ananassa_032	Midland
Unknown_ananassa_039	Unknown_ananassa_040
Unknown_ananassa_045	Unknown_ananassa_054
US_78-1760_AN	Floridabelle
US_78-1839_AN	NA
Van_Fleet_No.3	NA
VIR228613	Unknown_ananassa_339
Vola	Bowa
WI_6-2	NA
WI_8002	Scott
WSU_1985	WA_80053-17
WSU_685	Northwest
WSU_72-66-H	WSU_1019
Z_22	NA
Z_72	NA
Zb.53.116	Auchincruive_Climax
Bemanil	Cambridge_Favourite
Hapil	Gorella
Isaura	NA
Maxim	NA
Domanil	Souvenir_de_Charles_Machiroux
Demerland	NA
Idil	Bemanil
Souvenir_de_Charles_Machiroux	Ville_de_Paris
Triomphe_de_Gand	NA
A.F._Barron	Sir_J._Paxton
Abundance_1922	The_Earl
Alice	EM0474
Amelia	EM0533
Atkins_Continuity	NA
Bedford_Champion	Unknown_ananassa_351
Bicton_Pine	White_Carolina
Bishop's_Seedling_Scarlet	Hudson_Bay
Black_Prince	Keens_Imperial
British_Queen	NA
Buddy	Diamante
Cambridge_Aristocrat	Fairmore
Cambridge_Early_Pine	Cambridge_34-4-5
Cambridge_Epicure	Early_Cambridge
Cambridge_Forerunner	Early_Cambridge
Cambridge_Premier	Unknown_ananassa_043
Cambridge_Prizewinner	Early_Cambridge
Cambridge_Regent	Fairmore
Cambridge_Rival	Dorsett
Cambridge_Sentry	Dorsett
Cambridge_Vigour	US_3378
Captain	Crown_Prince
Carmine_Roseberry	Roseberry_1808
Cassandra_1998	Rosie_1991
Cassandra_1906	Bubach
Chelsea_Pensioner	NA
Christine	NA
Cockscomb_Scarlet	Keens_Imperial
Commander_1890	British_Queen
Competitor	Kerr_Prolific
Connoisseur	Scarlet_Queen
Cox's_Seedling	Elton
Cropper	Fillbasket
Cupid	EM786
Delia	Honeoye
Downton	Old_Black
Dr._Hogg	NA
Duchess_of_York	Laxtonian
Duncan's_Seedling	Keens_Seedling
Early_Cambridge	Ekey
Elegance	EM834
Elton	NA
Empress_of_India	Countess
Everest	Evita
Everglade	NA
Eve's_Delight	02P78
Fenella	Lucy
Filbert_Pine	NA
Fillbasket	Royal_Sovereign
Finesse	EM1117
Florence_1988	EM20
Foreman_Excelsior	James_Veitch
Frith	Aberdeen
Frogmore_Late_Pine	Filbert_Pine
Givons_Late	NA
Goliath	British_Queen
Gunton_Park	Countess
Hedley	Redgauntlet
Hermione	NA
International	Latest_Of_All
James_Veitch	NA
John_Ruskin	Black_Prince
Judibell	EM0620
Juliet	NA
Keens_Imperial	White_Carolina
Keens_Seedling	Keens_Imperial
King_George_V	Royal_Sovereign
King_of_the_Earlies	Black_Prince
Lady_Suffield	Lord_Suffield
Laura	EM147
Laxtonian	NA
Laxton's_Climax	Latest_Of_All
Laxton's_Latest	Latest_Of_All
Laxton's_Leader	Latest_Of_All
Laxton's_Monarch	Latest_Of_All
Noble	Foreman_Excelsior
Laxton's_Omega	Bedford_Champion
Lewisham_Scarlet	Hudson_Bay
Lord_Beatty	Bedford_Champion
Lord_Kitchener	British_Queen
Lord_Suffield	Countess
Lucy	Unknown_ananassa_283
Mae	Rosie_1991
Maincrop	Bedford_Champion
Majestic_1924	International
Malling_Centenary	SDBL102
Malling_Glow	EM881
Malling_Opal	EMR153
Malling_Pearl	EMR153
Malling_Silk	EM834
Malling_Sunrise	Emily
Malwina	Unknown_ananassa_426
Marshal_Foch	The_Bedford
Marshmello	Honeoye
May_Queen	NA
Mayflower	EM639
Mentmore	Noble
Merton_Dawn	Cambridge_Favourite
Merton_Herald	Tennessee_Beauty
Merton_Princess	Royal_Sovereign
Merton_Ruby	US_3378
Methven_Scarlet	Hudson_Bay
Napier	NA
Narrow_Leaf_Scarlet	Knight's_Large_Scarlet
Nicola	Symphony
Nobel	Korona
Old_Black	NA
Pandora	Unknown_ananassa_162
Perfection	LA0407
Perpetual	Laxton's_Monarch
Aromel	Redgauntlet
Royal_Sovereign	King_of_the_Earlies
Jucunda	NA
Cambridge_Rearguard	Northstar
Victorian_Nameless	NA
Cambridge_Late_Pine	Cambridge_34-4-5
North_Sea	NA
Cambridge_Favourite	Cambridge_34-4-5
Frel	Unknown_potentilla_FX012
Emily	Honeoye
Bolero	Selva
Pegasus	Redgauntlet
Calypso	Rapella
Eros	Elsanta
Tango	Rapella
Eastern_Pine	NA
Evita	Chandler
Flamenco	Evita
Pitsmatson_Black	Old_Black
President_Loubet	Waterloo
Prince_Albert	NA
Prince_of_Wales	Waterloo
Princess_Dagmar	NA
Princess_of_Wales	Latest_Of_All
Profit	Sir_J._Paxton
Progress	British_Queen
Providence	Gorella
Queen_of_Denmark	Frogmore_Late_Pine
Rearguard	Laxton's_Latest
Red_Cleo	NA
Red_Glory	NA
Red_Princess	NA
Red_Rio	NA
Red_Ruby	Unknown_potentilla_FX012
Reliance_1907	Vicomtesse_Hericart_de_Thury
Reward	Royal_Sovereign
Rival	Givons_Late
Robust	Bedford_Champion
Sallybright	SDBL101
Sasha	EM881
Scarlet_Queen	King_of_the_Earlies
Serenata	82/12-10
Sir_Douglas_Haig	Dr._Hogg
Sophie	EM75
SRV36	SSD_02
Wilmots_Superb	Roseberry_1808
Suzana	NA
Swainstone	NA
Sweet_Cone	Old_Black
Sweet_Eve	01BB64
Sweet_Pink	Unknown_ananassa_120
Sweet_Red	Unknown_ananassa_121
Sweetheart_1999	Rosie_1991
The_Admiral	Bedford_Champion
The_Alake	Frogmore_Late_Pine
The_Bedford	Dr._Hogg
The_Duke	Bedford_Champion
The_Earl	Waterloo
The_Khedive	Lord_Suffield
The_Laxton	Royal_Sovereign
The_Queen	Waterloo
Tit_Bit	Reliance_1907
Trafalgar	Latest_Of_All
Traveller	La_Constante
Utility	Laxton's_No.500
Veitch's_Perfection	British_Queen
Veitch's_Prolific	Empress_of_India
Verity	Evita
Vibrant_1998	SDBL101
Victoria	NA
Victoria_Ovata	NA
Victory_1919	British_Queen
Viktoriana	Unknown_ananassa_123
Viva_Patricia	S03AC11
White_Knight	King_of_the_Earlies
White_Perpetual	Louis_Gauthier
Yellow_Chili	Old_Chili
Amandine	88.09.06
Anabelle	Gariguette
Anais	Gariguette
Ananas_de_Guemene	Unknown_chiloensis_032
Angelina	Chandler
Armelle	NA
Aurore	NA
Avant_Tout	NA
Belle_de_Bordelaise	White_Alpine
Belle_et_Bonne	Madame_Moutot
Beltran	NA
Betty	Pajaro
Candiss	CF1713
Capella_Super_Herdam	NA
Capriss	Sweet_Charlie
Charlotte	Mara_des_Bois
Ciclade	Capitola
Ciflorette	Mamie
Cifrance	Scott
Cigaelle	Gariguette
Cigaline	Gariguette
Cigoulette	Belrubi
Cijosee	Mara_des_Bois
Cilade	Scott
Ciloe	Belrubi
Cirafine	Cal_18
Cirano	Mara_des_Bois
Cireine	Scott
Comte_de_Paris	Keens_Seedling
Darboise	Douglas
Darboprim	Senga_Pantagruella
Darestival	80-37-17
Darflash	Darestival
Darleta	Aiko
Darlibelle	Aiko
Darline	Aiko
Darlisa	Darestival
Darlisette	Darboise
Daroyal	Elsanta
Darsanga	Korona
Darselect	Parker
Darsidor	Aiko
Darsival	Fern
Darstar	Senga_Pantagruella
Darstella	Elsanta
Darubis	Oso_Grande
Delcoce	NA
Delefan	NA
Delician	NA
Deltomi	NA
Deluxe	16.01.18
Diana	NA
Docteur_Morere	Duc_de_Malakoff
Donna_2010	98.05.17
Dream	31.14.04
Duc_de_Malakoff	Chili_du_Plougastel
Durline	NA
Empereur_du_Maroc	NA
Empereur_Nicolas	NA
Favor	Harvester
Fertilite	Empereur_Nicolas
General_Chanzy	Joseph_Riffaud
General_de_Castelman	NA
General_de_Castelnau	NA
General_de_Gaulle	Reine_des_Precoces
Giant_Framboise	Muscade
Gladis	NA
Guillerette	NA
Hative_de_Caen	Aurore
Hercule	Record_1931
Joseph_Riffaud	NA
Janiss	NA
La_Chapelaine	Favette
La_France_Pacifique	NA
La_Perle_Rose	Louis_Gauthier
Lorette	NA
Louis_Gauthier	Belle_de_Meaux
Lucie_Boiselet	NA
Macao	NA
Madame_Lefebvre	NA
Madame_Poincare	Saint_Joseph
Majoral	Harvester
Mamie	Harvester
Manille	Gariguette
Mara_des_Bois	Unknown_ananassa_156
Marabella	Valeta
Maragrande	Ostara
Marajox	Frel
Maraline	Sequoia
Maraprime	Gariguette
Marascor	Toro
Marastar	NA
Marastil	Souvenir_de_Charles_Machiroux
Mareva	Mara_des_Bois
Marjolaine	Maraline
Marlate_1989	89-258
Marquise	Addie
Marrionnet_hybrid	NA
Matis	Marrionnet_hybrid
Merveille_de_France	Saint_Antoine_di_Padua
Mount_Everest	NA
Napoleon_III	British_Queen
Osiris	NA
Palmyre_Berger	Comte_de_Paris
Giant_Framboise_OP	Giant_Framboise
Perle_de_Prague	NA
Liberation_d'Orleans	NA
Appelever	NA
Belrubi	Pocahontas
Profusion	NA
Vicomtesse_Hericart_de_Thury	Keens_Seedling
Madame_Moutot	Docteur_Morere
Sans_Rivale	Madame_Poincare
Favette	Aliso
Precose_Musquee	Muscade
Prelude_1989	Primek
Princesse_Royale	Keens_Seedling
Record_1931	La_France_Pacifique
Reine_des_Precoces	Madame_Moutot
Robusta	Marguerite_Lebreton
Rubis_des_Jardins	Scott
Saint_Antoine_di_Padua	Royal_Sovereign
Saint_Joseph	White_Alpine
Sannie	Docteur_Morere
Siabelle	Parker
Starlette	NA
Surprise_des_Halles	Empereur_du_Maroc
Teutonia	NA
Triomphe	General_de_Castelman
Ville_de_Caen	Empereur_du_Maroc
Zenith	Dunlap
Zorgli	NA
Amerikanischer_Samling_II	NA
Anneliese	Georg_Soltwedel
Asieta	Madame_Moutot
Aurora_1955	Wunder_von_Kothen
Calea	Senga_Sengana
Deutsch_Evern_Bromba	Lihama
Deutsch_Evern_Solveta	Georg_Soltwedel
Deutsche_Perle	La_Perle_Rose
Dithmarschen	Flandern
Dorena	Clone_4802/27
Dresden_1951	Mieze_Schindler
Eva_Macherauch	Konigin_Luise
Fiesta	72/26
Finn	Fairfax
Florika	Klettererdebeere
Fraburga	Unknown_ananassa_128
Fracttina	Valentine_1941
Fracunda	Valentine_1941
Fragana	Senga_Rigensa
Fraginetta	Macherauch's_Fruhernte
Fralona	Unknown_ananassa_130
Framura	Anneliese
Fraroma	Senga_Sengana
Frau_Direktor_Echtenmeyer	NA
Frikonsa	Deutsch_Evern_Bromba
Fructana	Senga_54
Fructarella	Senga_Sengana
Frugodi	NA
Fruheste_der_Fruhen	Deutsch_Evern
Futura	Siletz
Gartenbaudirektor_Langer	Roter_Elefant
Gawes_Royal	Herzberg's_Triumph
Gento	NA
Georg_Soltwedel	Rotkappchen
Hamburg	Herbstfreude
Hansa	Noble
Havelland	Macherauch's_Fruhernte
Heinemann's_Unerschopfliche	Oberschlesien
Herbstfreude	Deutsche_Perle
Herz_As	Wunder_von_Kothen
Hobdoel	NA
Hobelda	NA
Hobottrece	NA
Hobthurcon	NA
Hobthurmarcin	NA
Hobthurmardu	NA
Hobthurmarqua	NA
Hobthurmarsei	NA
Hobthurmartre	NA
Hobthurmarun	NA
Holstein	La_Perle_Rose
Holtges_Rheingauperle	Georg_Soltwedel
Hummi	NA
Hummi_Aroma	Senga_Sengana
Hummi_Bella	Tenira
Hummi_Ferma	Asieta
Ines	NA
Inge_Sturm	Holstein
Jana	NA
Joghana	Unknown_ananassa_132
Juline	Unknown_ananassa_133
Karla	Talisman
Klettererdebeere	NA
Komet	Nb_72/13
Konia	Elsanta
Konig_von_Sachsen	NA
Konigin_Luise	NA
Late_Leopold	NA
Luiza	NA
Macherauch's_Dauerernte	Ada_Herzberg
Macherauch's_Fruhernte	Deutsch_Evern
Macherauch's_Marieva	Unknown_ananassa_007
Macherauch's_Spaternte	Mieze_Schindler
Machern	Herzberg's_Triumph
Mainperle	Sieger
Markee	NA
Marloun	Clone_23/6
Maximus	NA
Megana	Elsanta
Merkur	84/27
Mieze_Nova	Mieze_Schindler
Muncheberger_Fruhe	Konigin_Luise
Muncher_Kindl	Aprikose
Nb_72/13	NA
Nerina	NA
Nordika	Glima
Oberschlesien	Sharpless
Papa_Lange	Konig_von_Sachsen
Pemica	Redgauntlet
Pervagata	Direktor_Paul_Wallbaum
Senga_Sengana	Markee
Kaiser_Samling	Teutonia
Direktor_Paul_Wallbaum	Mieze_Schindler
Deutschland	NA
Hummi_Grandee	NA
Litessa	Markee
Jurica	Senga_54
Sonjana	Holstein
Deutsch_Evern	Unknown_ananassa_006
Senga_Precosana	Regina
Clonderg	Senga_Sengana
Gigana	Finn
Regina	Amerikanischer_Samling_II
Fratina	Valentine_1941
Lihama	NA
Tabea	Mieze_Schindler
Aprikose	Noble
Herzberg's_Triumph	Gartenbaudirektor_Langer
Mieze_Schindler	Lucida_Perfecta
Prinz_Julius_Ernst	Oberschlesien
Pyretta	Clone_7588
Quellana	Direktor_Paul_Wallbaum
Raveno	Hansa
Renaissance	Unknown_ananassa_344
Reusraths_Allerfruheste	Jucunda
Rheingold	Jucunda
Rose	NA
Rosenta	Redgauntlet
Roter_Elefant	NA
Rotkappchen	Deutsch_Evern
Senga_Dulcita	Senga_1021
Senga_Duretta	SO_14/78
Senga_Fructarina	NA
Senga_Precosa	Regina
Senga_Rigensa	NA
Sengabusch	NA
Solotaya	Hummi_Grandee
Sonja_Horstmann	NA
Splendida	Hummi_Grandee
Sturms_ZuckersuBe	Inge_Sturm
Susy	NA
Thulana	NA
Thuriga	Belrubi
Uberreich	NA
Vigerla	Unknown_ananassa_008
Weghorna	16/20
Wodiana	Regina
Wunder_von_Kothen	NA
Adria	Granda
Alba	Honeoye
Alessandra	Direktor_Paul_Wallbaum
Amy	NA
Anitabis	90.42.2
Antea	FBGL_3
Aprica	NA
Argentera	93.311.1
Ariel	NA
Arosa	Chandler
Asia	Maya
Athena	Douglas
Bisalta	Unknown_ananassa_244
Brilla	Unknown_ananassa_330
Brio	MDUS_3816
Capri	CIVRI30
Carezza	Addie
Charlene	Marisol
Civero	Chandler
Clea	Brock85
Clery	Onebor
Cortina	Addie
Cortine	Addie
Cristina	CN95_602_8
Dama	Belrubi
Dely	T2-6
Demetra	Irvine
Dipred	NA
Dita	Tenira
Dora_1996	91.143.5
Egla	Heidi
Elsegarde	Unknown_ananassa_321
Elsinore	Z1C-7
Eris	Selva
Etna	Belrubi
Eva	Darselect
Ferrara	MDUS_4083
Flaminia	NA
Flavia	NA
Galliaciv	NA
Garda	NA
Gardena	Addie
Gavi	NA
Gea	R_6660
Granda	83.5.8
Hera	Pajaro
Irma	Don
Isabella	Pocahontas
Ischia	CIVRI30
Joly	T2-6
Jonica	Kilo
Kamila	NA
Kilo	Rosa_Linda
Laetitia	NA
Lia	NA
Linosa	CIVRI30
Madeleine	Miranda_1993
Malga	Irma
Margherita	Siris
Marisol	Siris
Maya	NA
Melissa	Siris
Miranda_1993	Salvi_5
Miss	86.285.1
Murano	R6R1-26
Nabila	Ventana
Naiad	Oso_Grande
Nandi	NA
New_Ruby	NA
Nora	91.143.5
Onebor	Salvi_15
Palatina	Tudla
Paros	Onebor
Patty	Honeoye
Cesena	MDUS_3816
Dana	MDUS_3700
Francesco	NA
Savio	Tardiva_di_Romagna
Don	79.119.21
Linda	Unknown_ananassa_161
Nike	Douglas
Pircinque	Nora
Precoce_di_Romagna	Pocahontas
Premy	NA
Queen_Elisa	Miss
Quicky	NA
Rania	Ventana
Record_1992	Idea
Romina	95.617.1
Rossella	Sparkle
Rubea	Irvine
Rubinciv	NA
Sarica	NA
Selene	Chandler
Sella	Addie
Siba	H3B1-20
Sibilla	NA
Spargi	NA
Sugar_Lia	Miss
Sveva	EM483
SWTCOL	NA
Tardiva_di_Romagna	Macherauch's_Spaternte
Tecla	93.608.12
Teodora	Unknown_ananassa_287
Tethis	FB1
Tily	NA
Unica	Miss
Vale_1998	90.316.1
Vivara	NA
Zaffyra	NA
Zeta	93.64.9
Babette	Patty
Blink	Honeoye
Frida	As98
Gudleif	Cavendish
Gyda	Nora
Gypa	Nora
Inga_1995	Unknown_ananassa_238
Iris	Korona
Oda	Inga_1995
Jonsok	Senga_Sengana
Ridder	Rita
Rita	Polka
Rondo	Elan
Saga	Korona
Solgull	Glima
Aga_2002	Honeoye
Akcent	Unknown_ananassa_111
Alfa_Centauri	Pandora
Alioth	Unknown_ananassa_113
Amarant	Unknown_ananassa_114
Ambrozja	Unknown_ananassa_115
Ariadna	NA
Astra	Dana
Diastar	NA
Dukat	Koralowa_100
Elkat	Elsanta
Elsariusz	NA
Felina	Ottawa
Feltar	Unknown_ananassa_193
Feriusz	Ferrara
Filon	Seal
Filut	Syriusz
Granat	NA
Grandarosa	Granda
Heros	Gorella
Hulta	Litessa
Jota	Unknown_ananassa_194
Karel	Kama
Kaster	Senga_Sengana
Luna	Selva
Marcat	Onebor
Marduk	Onebor
Marilyn	Elsanta
Ozariwanka	NA
Panon	NA
Panvik	NA
Pastel	Paula
Patrycja	NA
Paula	Senga_Tigaiga
Pegat	Pegasus
Koralovaya	NA
Marsyalakaya	NA
Kama	Senga_Sengana
Pink_Rosa	Granda
Plena	Senga_Sengana
Real	Unknown_ananassa_249
Recoda	Real
Salut	Selva
Salwa	Selva
Seal	Senga_Sengana
Segal	Syriusz
Syriusz	Troubadour
Teresa	Unknown_ananassa_191
Vega	Senga_Sengana
Vikat	Vicoda
Ava	NA
Avablush	NA
Avajoy	NA
Avamaria	NA
Avarosa	NA
Avastar	NA
Avasurprise	NA
Crusader	Cambridge_Vigour
Marmion	Crusader
Montrose	Crusader
Auchincruive_Climax	TD-8
Redgauntlet	NJ_1051
Tantallon	61AP60
Saladin	61AP60
Melody	SCRI_66_M1
Symphony	Rhapsody
Rhapsody	SCRI_61G51
Templar	Auchincruive_11
Abundance_1905	Saint_Joseph
Aguedilla	Camarosa
Aires	Planasa_86-037
Amiga	Camarosa
Andana	Unknown_ananassa_153
Antilla	NA
Arena	Planasa_86-175
Besos	NA
Candy	NA
Carisma	Oso_Grande
Carmela	Planasa_92-61
Cartcua	Planasa_86-189
Cartdos	NA
Cartres	Planasa_86-175
Cartuno	86-184
Cegnida_Rem	Planasa_86-096
Coral	Unknown_ananassa_248
Creba	Aiko
Cristal	Planasa_92-61
Curtuno	NA
Diademe	NA
Durval	Pajaro
Fenix	NA
Fontanilla	SE-1823-4
Fuentepina	NA-676
Kouril	R_13_25
Lourdesa	NA
Macarena	88-033
Marina	Cartuno
Mariola	Douglas
Medina	Z_45
Milan	NA
Milcin	Chandler
Milprima	Aiko
Niebla	NA
Nieva	NA
Placartfre	Planasa_92-38
Plahuelfre	Planasa_92-44
Plarionfre	Planasa_92-61
Plarocifre	Planasa_92-61
Primoris	NA
Rabida	NA
Ribera	Parker
Rociera	NA
Sabrina	Planasa_9719
Sabrosa	Planasa_92-38
Safari	98-126
Sahara	Planasa_02-125
Santaclara	1084-1
Tintona	NA
Tudla	Parker
Vilanova	Aiko
Zincal	Chandler
Andrea	NA
Annelie	Ruegen
Felicia	Senga_Sengana
Glima	Senga_Sengana
Indra	Southland
Inga_1933	Frau_Direktor_Echtenmeyer
Kristina	Senga_Sengana
Lina	Unknown_ananassa_282
Luna_1934	Late_Leopold
Maruska	NA
Rebecka	Unknown_vescana_FX033
Sara	Annelie
Stella_1933	Frau_Direktor_Echtenmeyer
Viktoria	NA
Aga_1960	Fukuba
Aistro	Unknown_ananassa_184
Akanekko	Aiberry
Akashanomitsuko	Nyoho
Akasyanomitsuko	Nyoho
Akita_Berry	Morioka_16
Amaou	Kurume53
Amaterasu	Kinuama
Anther	Kei210
Asuka_Ruby	Asuka_Wave
Asuka_Wave	Unknown_ananassa_074
Awaitumo	NA
Awanatsuka	Tokukei_5
Beniatago	Toyonoka
Benihibari	America
Benihomalei	NA
Beniyutaka	Toyonoka
Berry_Star	Harunoka
Chikuma	Daikanko
Chikushi	Miyazaki
Chiyoda	America
Chizuru	Unknown_ananassa_140
Cyoju	NA
Daikanko	NA
Deco_Rouge	Pajaro
Diamond_Berry	Sagahonoka
Ebaberi	NA
Echigohime	Unknown_ananassa_213
Enrai	Donner
Everberry	Haruyoi
Fujisaki	Dorsett
Fukuayaka	Unknown_ananassa_215
Fukuharuka	Akihime
Fusanoka	Kiharu
Goryeong	Haikara
Haikara	NA
Hanagasaotome	Serenata
Hayazaki	NA
Himatsuri	Toyonoka
Himesodachi	NA
Hinomine	Terunoka
Hongbok	Kohuku
Hongxiutianxiang	Camarosa
Hotta_Wonder	Fukuba
Houkouwase	Kogyoku
Ikeko	NA
Josaenghingsim	Benizuru
Kaho	NA
Kanamihime	Tochiotome
Kaorino	0028401
Kekiwase	Asuka_Wave
Kentaro	Kita-ekubo
Kiharu	NA
Kita-ekubo	Unknown_ananassa_299
Kiyoka	Unknown_ananassa_300
Kogyoku	Fairfax
Kohuku	NA
Koju	Shuka
Koro	Marshall
Kyoko	Tochiotome
Kyokuho	Hokowase
Megumi	Unknown_ananassa_308
Meiho	Harunoka
Mimokigahoro	Haikara
Mingjing	Sunrise
Mingxu	Mingjing
Minomusume	Unknown_ananassa_309
Miranche	Akanekko
Miyasaki	NA
Miyoshi	Himesodachi
Myongbo	Meiho
Nanaimo	Totem
Natsuakari	Summer_Berry
Nohime	Aiberry
Oka	K75-13
Oonishiki	Unknown_ananassa_285
Osara	NA
Osuzu	Unknown_ananassa_212
Otomegokoro	Sakyu_S2
Ozeharuka	Tonehoppe
Pechika	Oishishikinari_2
Fukuba	General_Chanzy
Marshall_1956	Unknown_ananassa_158
Benizuru	Unknown_ananassa_038
Harunoka	Kurume103
Yachiyo	Lassen
Himiko	Kurume34
Haruyoi	Harunoka
Hogyoku	Fukuba
Miyazaki	NA
Nagasaki_Queen	NA
Nyohou	Unknown_ananassa_284
Reiko	HS-1
Syuukou	Shizutakara
Toyonoka	Harunoka
Tonami	NA
Hokowase	Kogyoku
Nyoho	Kei210
Aiberry	Reiko
Kagayaki	NA
Mishino	NA
Nagoya-oomi	NA
Oishishikinari_2	Institute_X2
Sizutakara	NA
Akihime	Kunowase
Pihyaradondon	Kei210
Pistro	Unknown_ananassa_181
Red_Pearl	Aiberry
Rindamore	Aiberry
Rouge	Unknown_ananassa_311
Sanchiigo	Unknown_ananassa_179
Sanukihime	Unknown_ananassa_312
Satohoro	Tioga
Sawaberry	Himiko
Shinnyoho	Kei210
Shizuchikara	Shizutakara
Shizunoka	Unknown_ananassa_313
Shizutakara	Unknown_ananassa_313
Shuka	NA
Shuko	Shizutakara
Shunho	Toyonoka
Sucambodiaberry	NA
Summer_Berry	Kaho
Summer_Candy	Tochiotome
Summer_Princess	Unknown_ananassa_200
Suruga_Red	Nyoho
Syuko	Shizutakara
The_Sun	NA
Tochihime	Tochinomine
Tochihitomi	Unknown_ananassa_314
Tochinomine	Kei511
Toki	Belle_Rouge
Tonehoppe	Kei56
Toshihime	Hokowase
Tsuburoman	Donner
Wonyuk	Himiko
Yayoihime	Tonehoppe
Yotsuboshi	Unknown_ananassa_207
Yumeamaka	Unknown_ananassa_316
Yumenoka	Kurume55
AAC_Lila	Queen_Elisa
Agassiz	Pathfinder
Alpha	Wilson
Arnold_Pride	Wilson
Beaver_Sweet	Sitka
Borden	Unknown_ananassa_355
Bright_Ida	Nicaise
Centennial	Unknown_ananassa_190
Chambly	Sparkle
Claribel	Ettersburg_121
Cordelia	Bubach
Della_K	Sharpless
Desdemona	Bubach
Early_Canada	Wilson
Elgin	Ettersburg_214
G19	Chandler
Glen	Marvel_1915
Glenalice	Simcoe
Glenciss	Gem
Glenda	Glenheart
Glenheart	Gem
Glenman	Glen
Glenmore	Unknown_ananassa_363
Glenrich	Glenciss
Harmonie	Yamaska
Hermia	William_Belt
Howe	Unknown_ananassa_019
Island	Lovett
Jim	Willard
Joerica	Willard
John	Willard
Joliette	Jewel
Jubilee_1952	Louise
Julia	Bubach
King	Unknown_ananassa_329
La_Cle_Des_Champs	SJ89244-6E
L'Acadie	Glooscap
Lacombe	Late_Stevens
Ladies'_Pine	Burr's_Seedling
Laurel	Allstar
L'Authentique_Orleans	L'Acadie
Lucetta	Bubach
Lucretta	Bubach
Mackenzie	Excelsior_1892
Maggie	Wilson
Magnum_Bonum	Ladies'_Pine
Maple_Bank	Crescent
Mariana	Bubach
Miranda_1906	Bubach
Nectarena	Howard_17
New_Dominion	Jucunda
New_Victoria	Royal_Sovereign
Northerner	Sparta_1936
Olga_Petrova	Howard_17
Ophelia_1906	William_Belt
Orleans	L'Acadie
Parker_1948	Sparta_1936
Parkland	Unknown_ananassa_049
Micmac	Tioga
Cavalier	Valentine_1941
Bounty	Jerseybelle
Totem	Puget_Beauty
Cheam	Siletz
Louise	Ettersburg_80
Glooscap	Micmac
Kent	K68-58
Redcoat	Sparkle
Tyee	Totem
Vibrant	Sparkle
Grenadier	Valentine_1941
Vantage	Tioga
Acadia	Redcrop
British_Sovereign	Magoon
Sumas	Cheam
Beaver_Ruby	Sitka
Beaver_Early	Cavalier
Beaver_Belle	Unknown_ananassa_166
Protem	Glenheart
Blomidon	K72-4
Annapolis	K74-5
Cornwallis	Earliglow
Veegem	Valentine_1941
Veeglow	Vibrant
Solprins	Glima
Cavendish	Glooscap
Settler	Guardian
Governor_Simcoe	Holiday
Saint_Williams	Guardsman
Scotland	Guardian
Rosalynne	Fern
Mira	Scott
Cabot	K87-5
Brunswick	Cavendish
Stolo	Puget_Reliance
Nisga'a	Cavendish
Porter's_Pride	Unknown_ananassa_050
Portia	William_Belt
Volunteer	Easypicker
Ralph	Superb
Roseberry_2010	SJ8518-11
Saanich_Belle	Magoon
Saint_Clair	OAC_18B34
Saint_Jean_D'Orleans	L'Acadie
Saint_Laurent_D'Orleans	L'Acadie
Sapphire	319A92
Saunders	Crescent
Secord	Guardian
Serenity	137A84
Shuswap	Holiday
Silvia	William_Belt
Simcoe	Unknown_ananassa_011
Sparta_1936	Gem
Startyme	V7705-3
Summer_Dawn	Unknown_ananassa_174
Summer_Evening	Idea
Summer_Gem	81RT2
Summer_Rose	137A84
Summer_Ruby	57K104
Tendersweet	Northerner
Tupper	Ettersburg_214
Valentine_1941	Howard_17
Valentine_1919	Williams
Valet	Williams
Valiant	Brandywine
Valid	Dunlap
Valley_Sunset	K94-15
Valonic	Dunlap
Valor_1919	Dunlap
Vambrace	Dunlap
Van_Dyke	Dunlap
Vandevere	Van_Deman
Vanessa	Dunlap
Vanilla	Dunlap
Vanquish	Dunlap
Vanrouge	ON_180115
Vantage_1919	Williams
Vaquero	Williams
Varangian	Williams
Vassal	Early_Ozark
Vast	Early_Ozark
Vaunt	Brandywine
Vavasor	Pocomoke
Vaward	Pocomoke
Vector	Pocomoke
Veda	Sample
Vena	Parsons
Vendance	Nettie
Vendor	Dunlap
Vendue	Williams
Venus	Joe
Viola_1906	William_Belt
Virgilia	William_Belt
Wendy	K96-5
Westney	Glen_Mary
Whonnock	Sumas
Wright	Unknown_ananassa_386
Yamaska	Pandora
Abundance_1908	Red_Cross_NA
Aishkum	Black_Beauty
Amanda	Sample
Amazing	Ogallala
Ambrosia_Late	NA
America_1909	Louis_Gauthier
American_Sweetheart	Armore
Americus	Pan_American
Aroma	Cumberland_Triumph
Arrow	Haverland
Arrowhead	Duluth
Auburn	Haverland
Autumn_Surprise	Ogallala
Beder_Wood	NA
Benoy	Bubach
Berlin_1902	Haverland
Bidwell	Pistillate_Scarlet
Big_Bob_NA	Russell's_Prolific
Big_Bob's_Baby	Big_Bob
Big_Rock	Dawn
Bird	Manchester
Bisel	Wilson
Black_Beauty	Dawn
Blaine	Beder_Wood
Blonde	Haverland
Boudinot	Wilson
Bradley	Crescent
Brownie	Cumberland_Triumph
Brune's_Marvel	Progressive
Bubach	NA
Burgundy	Dunlap
Burrill	Crescent
Burr's_New_Pine	Hovey
Buster	Bubach
Candy_Red	Ozark_Beauty
Cardinal_1896	Warfield
Cassady's_Russell	Russell's_Prolific
Champion_Everbearing	NA
Chaska	Brandywine
Chippewa_1912	Haverland
Chippewa_1920	Black_Beauty
Clyde	Cyclone_1889
Cobden	Wilson
Cobden_King	Warfield
Collins	Beder_Wood
Columbus	Hovey
Commission	Dawn
Crimson_King	Trumpeter
Cyclone_1889	Crescent
Dakota	Crescent
Dawn	Moore's_Prolific
Deep_Red	Midland
Deephaven	Dunlap
Dew	Sharpless
Dewdrop	Unknown_ananassa_359
Discovery	Warfield
Dora_1895	Crescent
Dornan	NA
Dry_Weather	Americus
Duluth	Pan_American
Dunmore	Dawn
Dutter	Jersey_Queen
Earlimore	SY5305_46
Early_Beauty	Crescent
Easypicker	Dunlap
Edgar_Queen	Captain_Jack
Effie	Barton
Ekey	Warfield
Elizabeth	Burr's_New_Pine
Endicott	Wilson
Enhance	Windsor
Enormous	Crescent
Esteem	Ambrosia_Late
Eureka_1881	Cumberland
Evermore	Duluth
Fantasy	Unknown_ananassa_055
Finch's_Seedling	Russell's_Prolific
Fowler's_Seedling	Red_Jacket
Frances_Cleveland	Cumberland_Triumph
Francis	Pan_American
Gem	Champion_Everbearing
General_Pershing	McKinley
Gill	Beder_Wood
Gillespie	Haverland
Glare	Iowa_3-7165
Glendale	NA
Glenfield	Warren_1876
Golden_King	Warfield
Golden_Queen	Wilson
Goodwin	Dawn
Governor_Hoard	Sharpless
Grand_Marie	Dawn
Granville	Miner
Gray	Gandy
Haight	Wilson
Haverland	Crescent
Heath	Crescent
Herald	NA
Herbst	Warfield
Hiawatha	Aroma
Honey_Lump	Marvel_1915
Honeymoon	Black_Beauty
Huddleston's_Favorite	Wilson
Indiana_1905	Red_Cross_NA
Indiana_1875	Charles_Downing
Ionia	Parker_Earle
Iowa	Dunlap
Irena	Jessie
Itasca_1886	Manchester
Ivanhoe	Crescent
Jarbalo	Frances_Cleveland
Jerry_Rusk	Bubach
Jessie	Sharpless
Joan	Ananas_de_Guemene
Julien	Peabody's_Seedling
July	Warfield
June_Rockhill	Rockhill
Kanner_King	Glen_Mary
Kansas_Prolific	Warfield
Kellogg's_Perfection	Rockhill_No.6
Kellogg's_Prize	NA
Kramer	Wilson
Lafollette	McKinley
Leviathan	Sharpless
Livingston	Warfield
Locke_Lake_Ruby	Red_Rich
Logan	Crescent
Longfield	Warfield
Longworth	Hovey
Loomis_Pearl	Gandy
Loyal	Superb
Luxury	Brandywine
Lyons	Bubach
Manwell	Crescent
Marconi	Warfield
Marguerite	Jewell
Marie	Crescent
Martha	Wilson
Marvel_1915	Dunlap
Marvin	Wilson
Mary_1903	Bubach
Masterpiece	Mastodon
Mastodon	Kellogg's_Prize
McAvoy's_Superior	Hovey
McKinley	NA
Mele	Crescent
Metcalf_Early	NA
Miami	Big_Bob
Michigan	Pistillate_Scarlet
Minnehaha	Minnesota
Minnesota	Dunlap
Minnetonka	Unknown_ananassa_057
Model	William_Belt
Monarch	Green_Prolific
Monitor_1898	Warfield
Moore's_Prolific	NA
Mote's_Seedling	Hovey
Mottier's_Seedling	Hudson_Bay
Mr._Big	Robinson
Mrs_Garfield	Sharpless
Nauvoo	Jucunda
Nehring	Glendale
Neverfail	Bubach
Nich_Ohmer	Middlefield
Nile's_Seedling	Wilson
Ninety_Six	Barton
No._999_Giant	Unknown_ananassa_394
Nokomis	Dunlap
Nonesuch	Sharpless
Ohio	Kentucky
Ohio_Mammoth	Hovey
Old_John_Brown	Wilson
Oliver_Goldsmith	Charles_Downing
Ona	Crescent
Ottawa	Agriculturist
Paris_King	Captain_Jack
Park_Beauty	Crescent
Peak's_Emperor	Hovey
Pearl_1913	Commonwealth
Pennholm	Twentieth_Century
Phillips	Sharpless
Badgerbelle	Robinson
Vermilion	Redstar
Cyclone	Iowa_1-3713
Robinson	Howard_17
Ourown	Gem
Beaver	Burrill
Armore	Blakemore
Delite	Albritton
Gilbert	Cyclone
Northland	Howard_17
Badgerglo	Sparkle
Red_Giant	Red_Rich
Stoplight	6-5908
Dunlap	Crescent
Mars	Iowa_81-6733
Trumpeter	Burgundy
Clare	Iowa_3_7145
Northeaster	MDUS_4380
Shortcake	Unknown_ananassa_164
Mesabi	Glooscap
Winona	Earliglow
Itasca	Seneca
Pineapple	Dunlap
Piper	NA
Plentiful	Redstar
Plow_City	Atlantic
Plumb_Bob	Haverland
Pokagon	Goldsborough
Princeton_Chief	Crescent
Progressive	Dunlap
Prolific_1893	Bubach
Purdue	Bubach
Red_Gold	Howard_17
Red_Jacket	Wilson
Red_Prolific	Ionia
Red_Queen	NA
Red_Rich	Fairfax
Red_Titan	Howard_17
Redstart	Honeoye
Ridgeway	Jersey_Queen
Rio	Sharpless
Rival_Hudson	Early_Hudson
Robin's_Arena	Wilson
Robinson_1891	Crescent
Rockhill	Early_Jersey_Giant
Roosevelt	Warfield
Royalty	Ozark_Beauty
Ruby_1890	Crescent
Ruby_King	Warfield
Satisfaction	Wilson
Scarlet_Melting	Hovey
Schild's_No.19	Dawn
Sharon_1936	Corvallis
Shawnee	Cyclone_1889
Smith's_Seedling	Wilson
Sparta_1895	Warfield
Splendid	NA
Spring_Beauty	Ogallala
Spring_Giant	Twentieth_Century
Springdale_Beauty	Crescent
Standpat	Pan_American
Staples	Warfield
Star	NA
Stone	Crescent
Sucker_State	Green_Prolific
Sultan	Esteem
Sunburst	Streamliner
Swedenberg	Beder_Wood
Sweet_Abundance	Red_Rich
Sweet_Surprise	Ozark_Beauty
Temptation	Ogallala
Tom_Walker	Sharpless
Ulrich_Imperial	Burgundy
Uncle_Sam	Herald
Universal_Res	Ogallala
Up_To_Date	Haverland
Velvet	Bubach
Viola_1884	Green_Prolific
Warfield	Crescent
Wasatch	Seascape
Wild_Flavor	Dunlap
William_Belt	NA
Windsor	Champion
Wisconsin_Queen	WI_214
Wisconsin_Seedling	Triomphe_de_Gand
Wonderbearing	Dunlap
Woodruff	Warfield_No.2
Wren	Dunlap
Yahoo	Aroma
Zula	Cyclone_1889
Abington	NA
Abington_Blush	Wilson
Addison	President
Adirondack	Fairfax
Advance	Autumn
Agriculturist	Green_Prolific
Alaska	Climax
Alden	President
All_Season	Superb
American_Queen	Montevideo_Pine
Angola	President
Anna_Kennedy	Jersey_Queen
Arcade	President
Archer	NY_1786
Argyle	President
Aromatic_Crimson	Black_Prince
Ashton	President
Athens	President
Atlantic	NA
Aurora_1907	Prolific_1899
Austin_Shaker	Early_Washington
Autumn	Pan_American
Babylon	Monarch
Banana	Agriculturist
Banquet	Miner
Barrymore	Sample
Beacon	President
Beal	William_Belt
Beecher	Champion
Belmont	NA
Bessie_1899	Haverland
Beverly	Miner
Black_Defiance	Green_Prolific
Blaze	Unknown_ananassa_009
Bliss	Chesapeake
Bomba_1885	King_Cluster
Boquet	Chesapeake
Boston_Pine	Grove_End_Scarlet
Bouncer	Jersey_Queen
Bountiful_1900	Glen_Mary
Boynton	Crescent
Brandywine	Glendale
Brighton_Pine	Boston_Pine
Brilliant_1845	Crimson_Cone
Bristol	Unknown_ananassa_015
Brooklyn_Scarlet	Peabody's_Seedling
Bryan's_Satisfaction	Wilson
Bryant	Crescent
Buckbee	Chesapeake
Bull_Moose	Glen_Mary
Caledonia	Marshall
California	Glen_Mary
Camden	Marshall
Carrie_Silvers	Unknown_ananassa_061
Cato	Marshall
Champion	NA
Chorlton's_Prolific	Burr's_New_Pine
Cinderella	NA
Clara	Sample
Clermont	Marshall
Cohansey	Triomphe_de_Gand
Collingwood_1913	President
Collosus	Bubach
Colonel_Cheney	Russell's_Prolific
Commonwealth	NA
Cooper	Pan_American
Cornucopia	Hudson_Bay
Crescent	New_Jersey_Scarlet
King_Cluster	NA
Crimson_Favorite	Wilson
Crimson_Glow	Fairfax
Culver	Marshall
Cumberland	Gandy
Cumberland_Triumph	Green_Prolific
Daisy	Crescent
Darlington	Gandy
De_Wet	Bubach
Deacon	Sample
Delicious	Atlantic
Dewey_1883	Jersey_Queen
Dicky	Sample
Dixon	William_Belt
Doctor_Warder	Fillmore
Dollar	NA
Dollar_2	Dollar
Dollar_Jr.	Dollar
Dresden_1939	Beacon
Duchess	NA
Duncan	Russell's_Prolific
Earle_Felten	Felten_3001
Early_Bird	Dunlap
Early_Jersey_Giant	NA
Early_Queen	Metcalf_Early
Eden	Dresden_1939
Elma	Unknown_ananassa_396
Erie	Sparkle
Essex	Howard_17
Excelsior_1895	Crescent
Fay	NA
Felton	Sharpless
First_Quality	Sample
Fisher	Bubach
Fleming	McAvoy's_Superior
Fort	Sample
Forward	Autumn
Free_Silver	Bubach
Fremont	Belmont
French's_Seedling	Hovey
Friendship	Maximus
Frontenac	Erie
Fulton	Starbright
Gala	Midland
Gamargua	Wilson
General_Botha	Bubach
General_Grant	Russell's_Prolific
General_Meade	Russell's_Prolific
General_Putnam	Cumberland_Triumph
General_Sherman	Russell's_Prolific
Genesee	Hovey
Glastonbury	Haverland
Glen_Mary	NA
Globose_Cluster	Early_Washington
Great_American	NA
Great_Bay	Simcoe
Great_Scott	Bubach
Green_Mountain	Howard_17
Green_Prolific	Goliath
Ham	Mary_1894
Hawaii	Haverland
Hazel	Bubach
Hebron	Unknown_ananassa_056
Henry_Ward_Beecher	Champion
Heritage	Barton
Herriot	NY_299
Hilton	Sharpless
Hovey	Keens_Seedling
Howard	Barton
Howard_Supreme	Howard_103
Hub	Bubach
Hunn	Johnson's_Late
Hunterdon	President
Jenny_Lind	Old_Scarlet
Jersey_Queen	NA
Jewell	Jersey_Queen
Johnson's_Late	NA
Jucunda_Improved	Jucunda
July_Morn	Redheart
Kerr_Prolific	NA
Kevitt	Bubach
Killarney	Jessie
Kissena	British_Queen
Ladies'_Aromatic	Ladies'_Pine
Lady_Finger	NA
Lady_of_the_Lake	Prince_Albert
Late_Stevens	Cumberland
Latest	Jewell
Le_Baron	Swainstone
Legal_Tender	Lady_Finger
Lehigh	Crescent
Lester_Lovett	Gandy
Liberty_Bell	Gandy
Lindenwald	Bubach
Louis_Ella	Brandywine
Lustre	Felten_3001
Magnate	Warfield
Magnus	Hunn
Malvina	Hovey
Manchester	NA
Mary_1894	Windsor
Matilda	Triomphe_de_Gand
May_King	Crescent
Maywood	Sample
McAlpine	Glen_Mary
Mden	President
Middlefield	NA
Midnight	Haverland
Mildred_Felten	Fairfax
Millay_Everbearer	Red_Rich
Millionaire	Mary_1894
Monitor_1859	Peabody's_Seedling
Monmouth	Aberdeen
Monmouth_1885	Jersey_Queen
Monroe	Rough_Rider
Monroe_Scarlet	Hovey
Montevideo_Pine	NA
Moore's_Early	Wilson
Morgan	Triomphe_de_Gand
Mount_Vernon	Jucunda
Moyamensing	Hudson_Bay
Mrs_Fisher	Unknown_ananassa_058
Nettie	Unknown_ananassa_060
New_York	Bubach
Nicanor	Triomphe_de_Gand
Nina	Jersey_Queen
North_Shore	Brandywine
Norwood	Maximus
Omega	Captain_Jack
Oneida	Sharpless
Onondaga	Hovey
Onward	Autumn
Oom_Paul	Jessie
Ophelia_1855	Scarlet_Magnate
Orient	Monarch
Oswego	Bubach
Paragon	Russell's_Prolific
Parcell	Haverland
Parker_Earle_Improved	Parker_Earle
Pathfinder	Howard_17
Paul_Jones	Haverland
Pearl_1889	NA
Pennsylvania	Moyamensing
Perfumed_Pine	Burr's_Seedling
Phelps	King
Phil_Sheridan	Russell's_Prolific
Catskill	Marshall
Jerseybelle	NJ_925
Orland	Aberdeen
Big_Joe	Unknown_ananassa_151
Fletcher	Midland
Garnet	Midland
Merrimack	NH_179
Empire	Dresden_1939
Fortune	US_2827
Geneva	NY_316
Raritan	Redglow
Aberdeen	Late_Stevens
Lupton	Joe
Marshall	NA
Canoga	NY_1123
Jewel	NY_1221
Seneca	NY_1261
Clancy	MDUS_5199
L'Amour	NY_256
Porto_Rico	Haverland
President	NA
President_Lincoln	NA
President_Wilder	Hovey
Primate	Prince_Albert
Primoridan	Crimson_Cone
Prince_of_Berries	Jersey_Queen
Productive	Autumn
Profuse_Scarlet	Large_Early_Scarlet
Prolific_1899	Sample
Purple_Wonder	NY_299
Quality	Hunn
Reba	Gandy
Redcrop	Aberdeen
Redwing	NJ_46
Regina_1890	Longworth
Reliance_1905	Mary_1894
Rippowam	Bicton_Pine
Robbie	Gandy
Romeyn_Seedling	Triomphe_de_Gand
Rough_Rider	Bubach
Rubicon	Primetime
Ruby_Red	Unknown_ananassa_230
Rural_Gem	Crescent
Rush	Miner
[truncated: 15,704 more rows]
